# Supplementary material
Source: PubMed Central journal article supplement (PMC8076040)

**Figure S1**

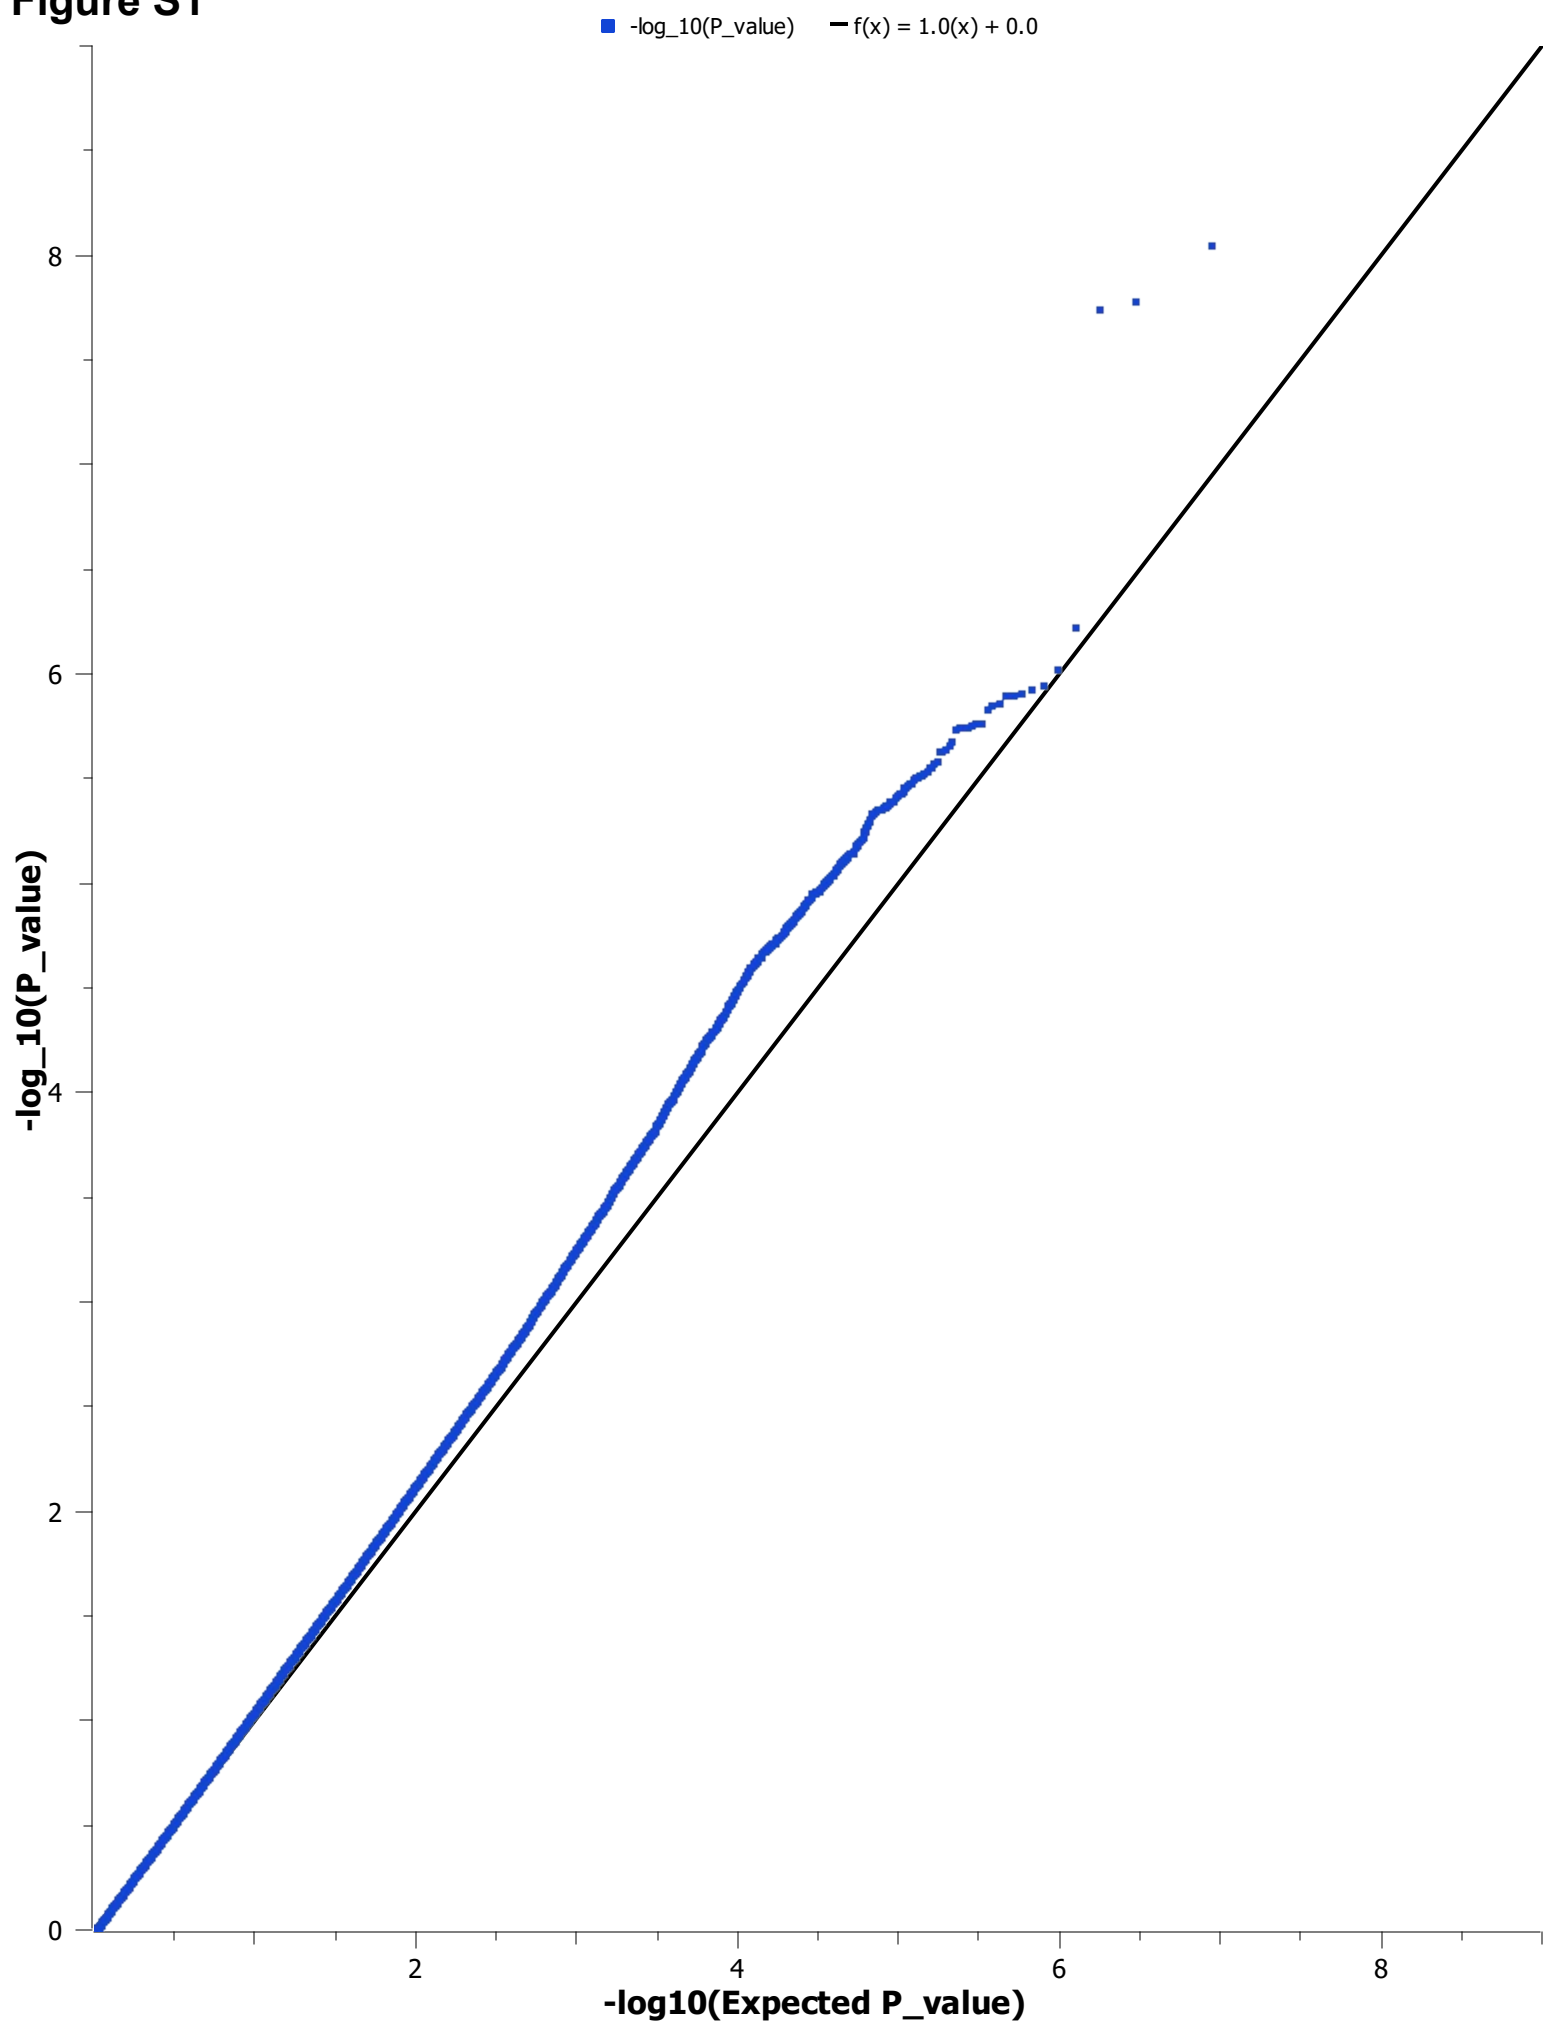

Figure S2

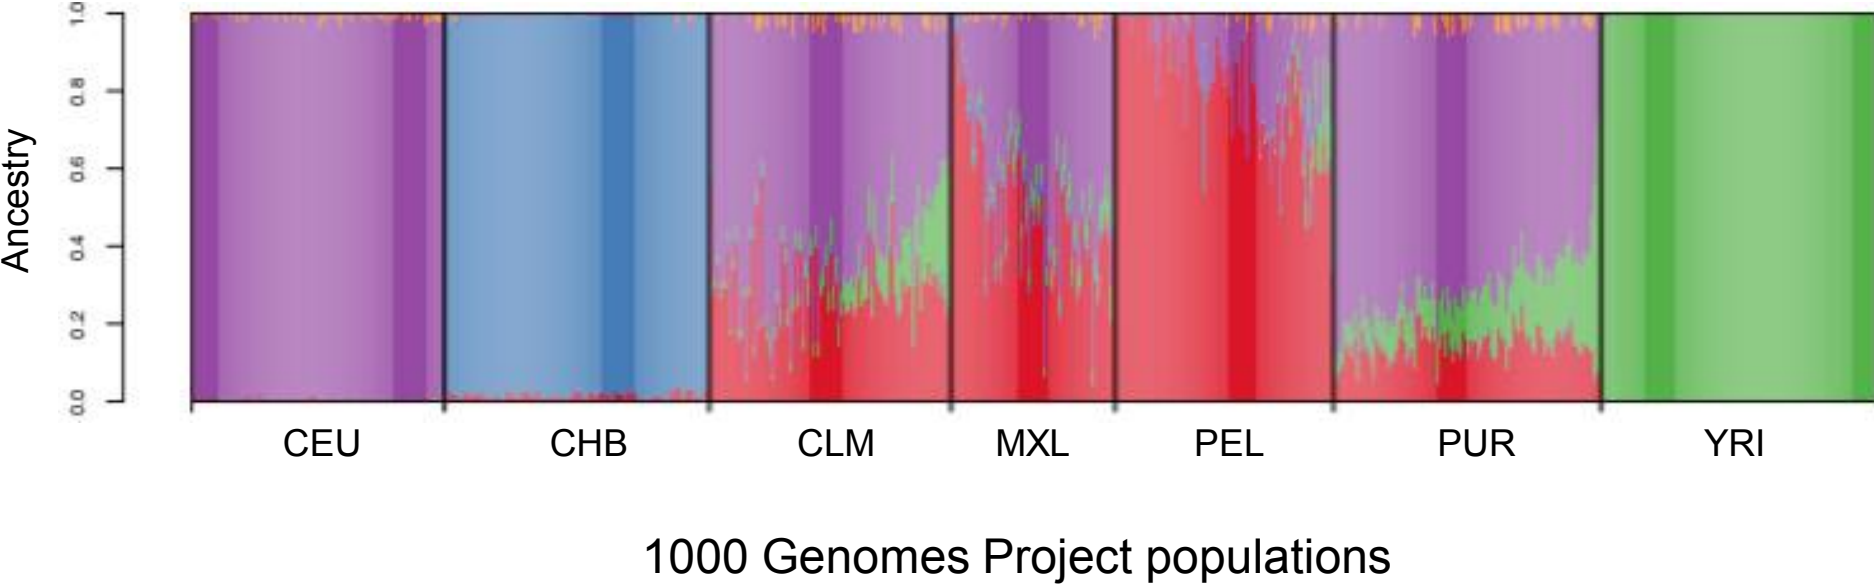

**Figure S3**

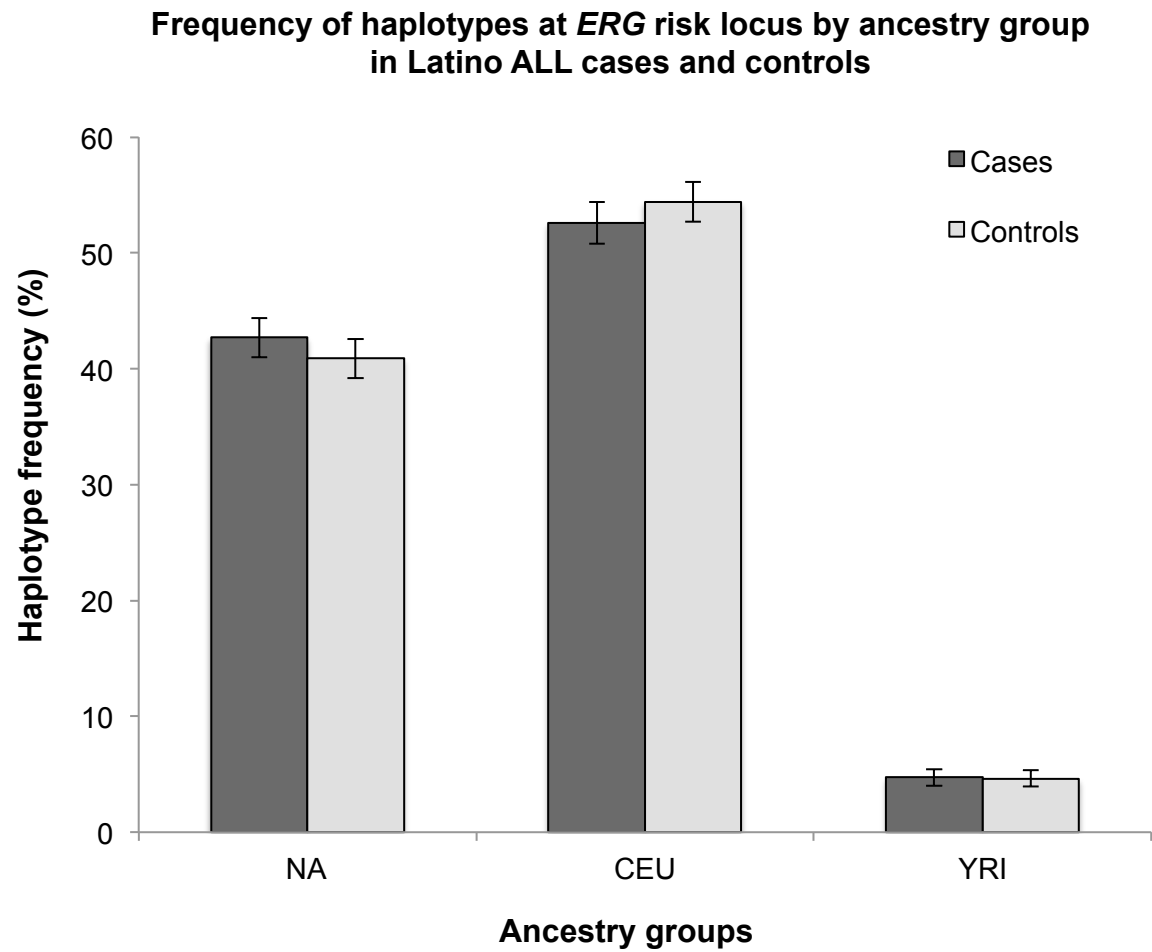

Figure S4

A

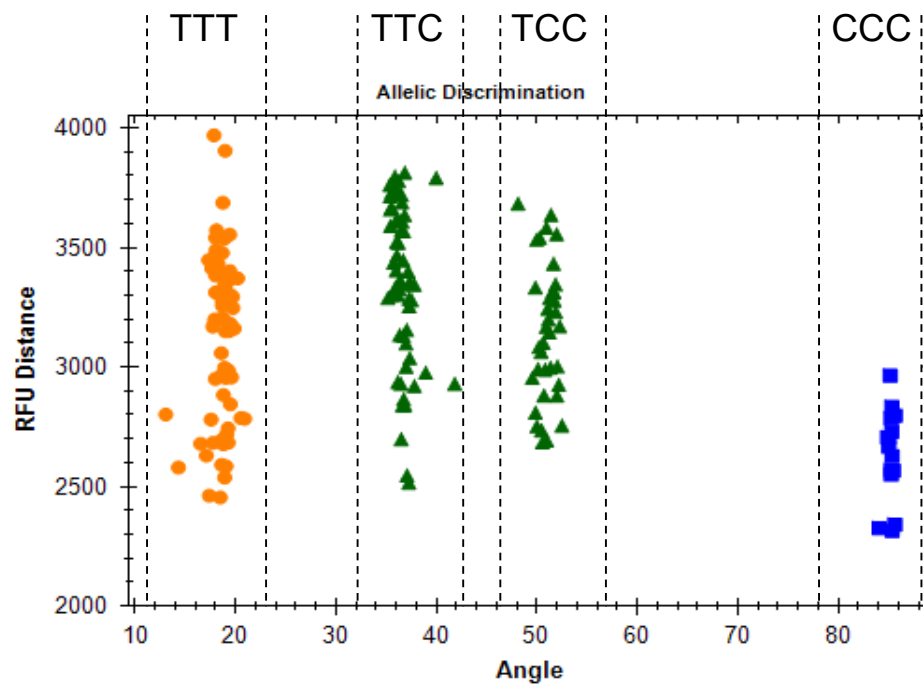

B

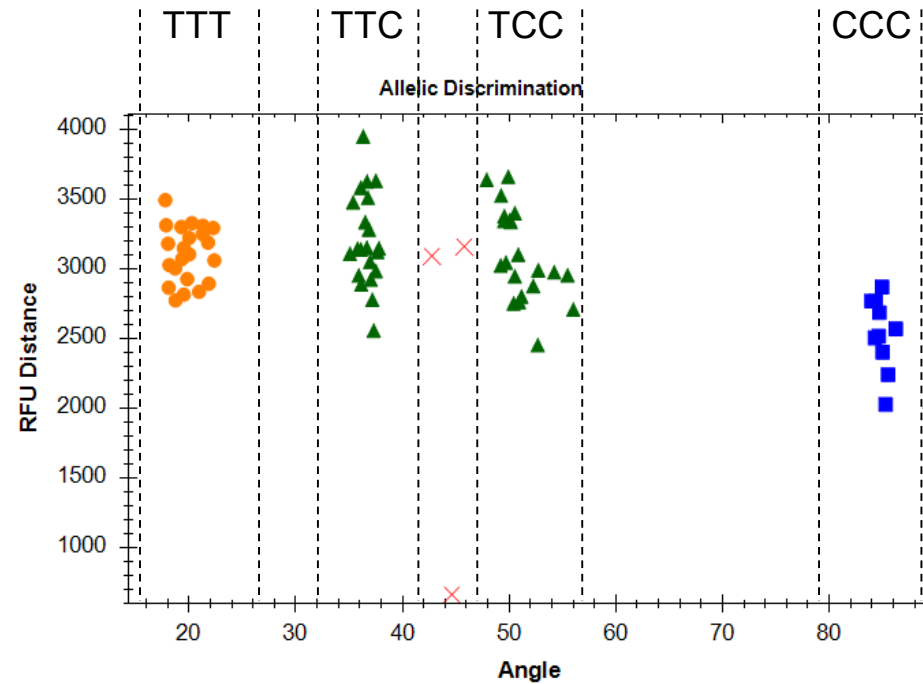

Figure S5

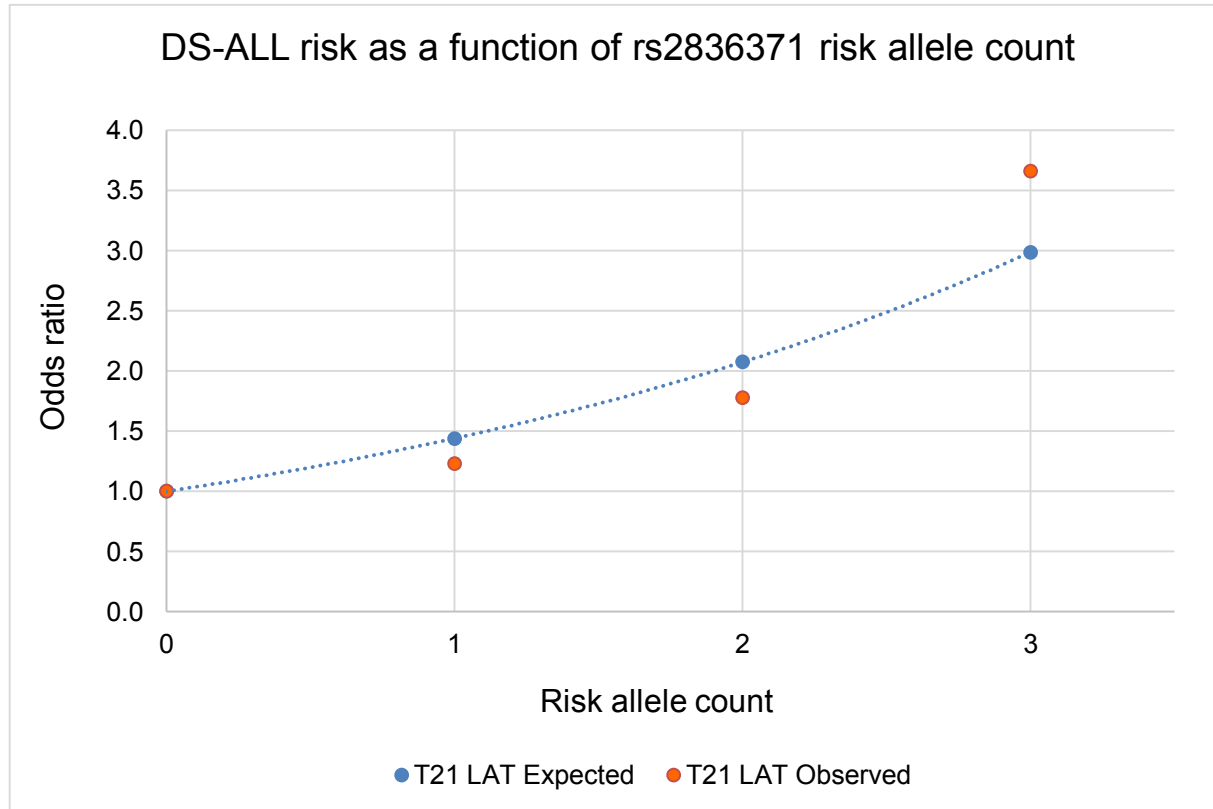

**Figure S6**

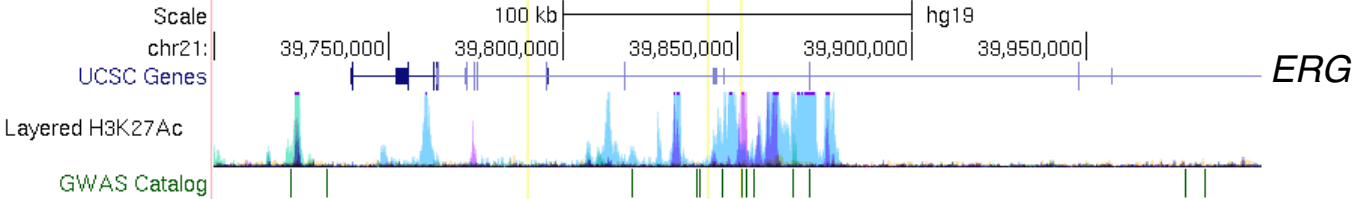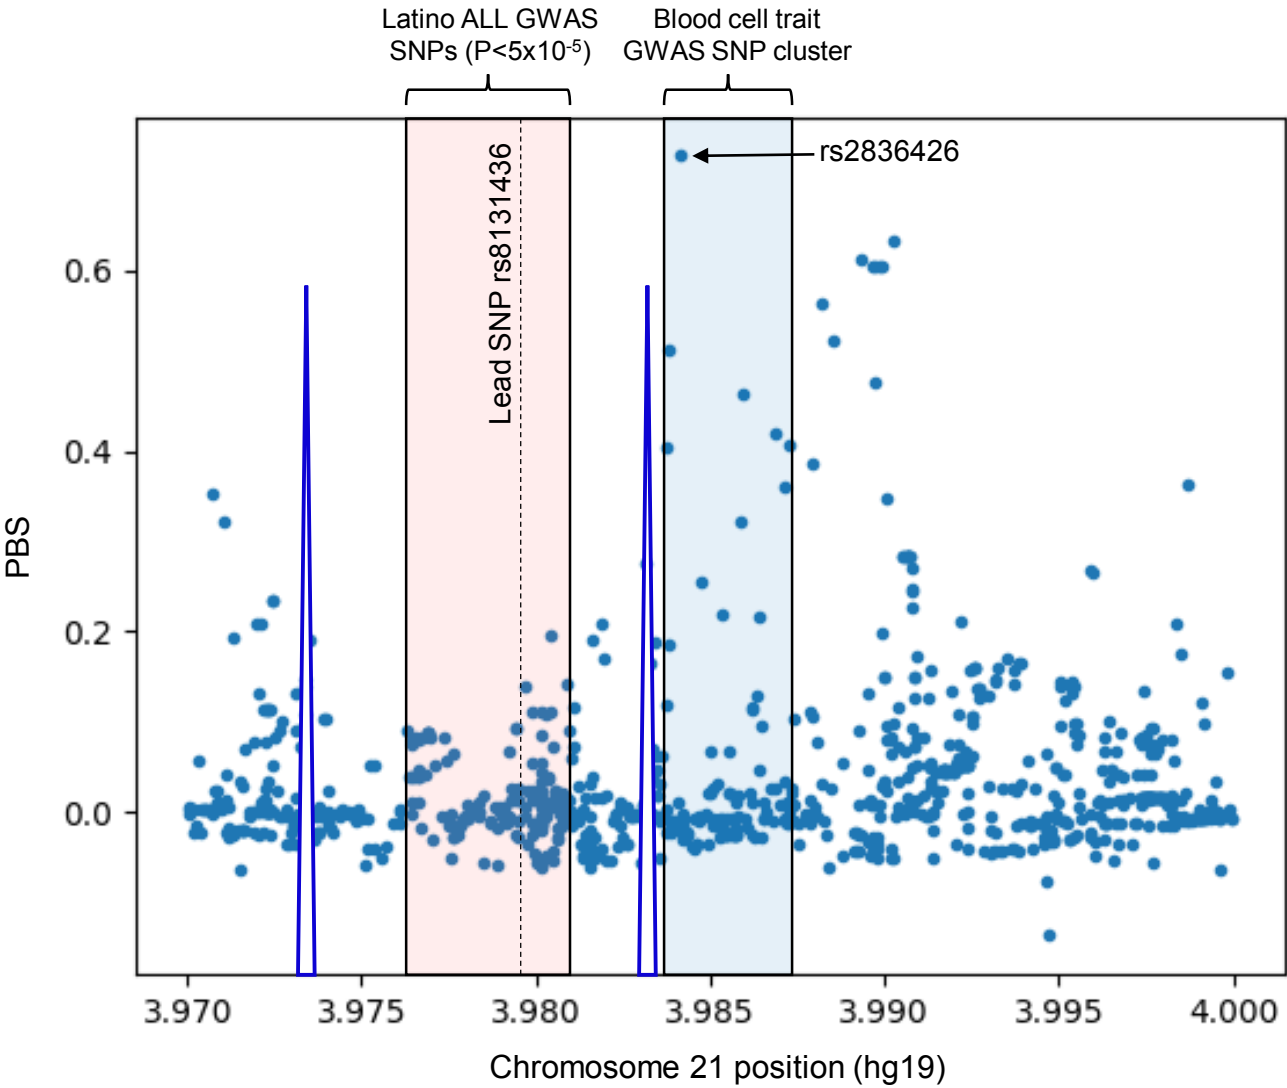

**Figure S7**

Reverse complement

ESS motif score: 70.9

ESS motif score: 88.1

rs2836361

ERGalt exon

T  
C C A A T G G A A G T T T T C A G A C A A A C G

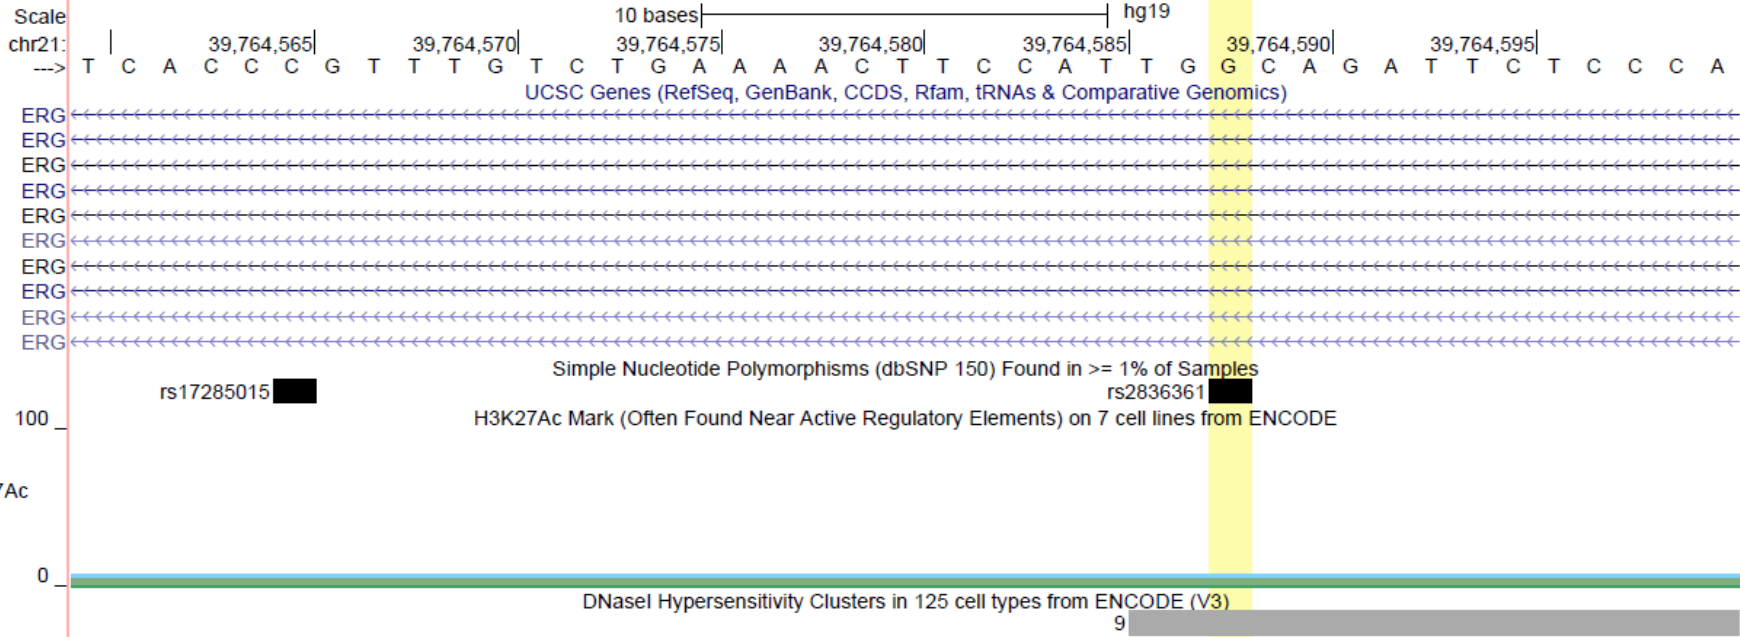

Supplement: 41375_2019_514_MOESM2_ESM.pdf [file 41375_2019_514_MOESM2_ESM.pdf]
